# Supplementary material
Source: Elsevier journal article supplement (https://www.sciencedirect.com/science/article/pii/S2173573520300806)
Supplement: mmc1 [file S2173573520300806:mmc1.doc]

# Apéndice

## Informe de DISE

Fármaco/s sedante/s:

Método de sedación (bolos/ TCI/Bomba):

Dosis total de fármaco y concentración:

Saturación de Oxígeno mínima:

BIS:

Hallazgos VAS basal

| ESTRUCTURA | GRADO DE OBSTRUCCIÓN | CONFIGURACIÓN | | |
| --- | --- | --- | --- | --- |
| A-P | LATERAL | CONCÉNTRICO |
| Velo |  |  |  |  |
| Paredes Laterales |  |  |  |  |
| Base de Lengua |  |  |  |  |
| Epiglotis |  |  |  |  |

**0**: No obstrucción (no vibración)

**1**: Obstrucción Parcial o vibración

**2**: Obst. Completa

**X**: No visto.

Con Maniobra de Avance Mandibular/ DAM

| ESTRUCTURA | GRADO DE OBSTRUCCIÓN | CONFIGURACIÓN | | |
| --- | --- | --- | --- | --- |
| A-P | LATERAL | CONCÉNTRICO |
| Velo |  |  |  |  |
| Paredes Laterales |  |  |  |  |
| Base de Lengua |  |  |  |  |
| Epiglotis |  |  |  |  |

Rotación de la cabeza: Si/No/ Cambios observados

Otras maniobras y hallazgos:

Conclusiones:

Indicación de tratamiento:
